# Supplementary material
Source: ML conference proceedings conference paper supplement (https://proceedings.neurips.cc/paper_files/paper/2019/hash/5acdc9ca5d99ae66afdfe1eea0e3b26b-Abstract.html)
Supplement: Supplementary file [file 5acdc9ca5d99ae66afdfe1eea0e3b26b-Supplemental.zip]

---

# Supplement to “Statistical bounds for entropic optimal transport: sample complexity and the central limit theorem”

---

Gonzalo Mena  
Harvard

Jonathan Niles-Weed  
NYU

Throughout the supplement, the symbol  $C$  will be used to indicate an unspecified positive constant whose value may change from line to line. Subscripts will be used to indicate if  $C$  depends on any other parameters.

## A Supplementary results

**Lemma A.1.** *If  $P$  is  $\sigma^2$  subgaussian, then*

$$E_P \|X\|^{2k} \leq (2d\sigma^2)^k k!$$

*for all nonnegative integers  $k$ , and*

$$E_P e^{v \cdot X} \leq E_P e^{\|v\| \|X\|} \leq 2e^{\frac{d\sigma^2}{2} \|v\|^2}$$

*for all  $v \in \mathbb{R}^d$ .*

*Proof.* For the first claim, it suffices to take expectations of both sides of the inequality  $\frac{\|X\|^{2k}}{(2d\sigma^2)^k k!} \leq e^{\frac{\|X\|^2}{2d\sigma^2}} - 1$  and use the assumption that  $P$  is  $\sigma^2$ -subgaussian. To prove the second claim, we use the inequality  $v \cdot X \leq \|v\| \|X\| \leq \frac{d\sigma^2}{2} \|v\|^2 + \frac{1}{2d\sigma^2} \|X\|^2$  and apply subgaussianity.  $\square$

**Proposition A.1.** *Let  $P$  and  $Q$  be two  $\sigma^2$ -subgaussian distributions. Then there exist smooth optimal potentials  $(f, g)$  for  $S(P, Q)$  such that*

$$\begin{aligned} -d\sigma^2(1 + \frac{1}{2}(\|x\| + \sqrt{2d}\sigma)^2) - 1 &\leq f(x) \leq \frac{1}{2}(\|x\| + \sqrt{2d}\sigma)^2 \\ -d\sigma^2(1 + \frac{1}{2}(\|y\| + \sqrt{2d}\sigma)^2) - 1 &\leq g(y) \leq \frac{1}{2}(\|y\| + \sqrt{2d}\sigma)^2 \end{aligned}$$

*and the dual optimality conditions (4) hold for all  $x, y \in \mathbb{R}^d$ .*

*Proof.* Let  $(f_0, g_0)$  be any pair of optimal potentials. Since  $(f_0 + K, g_0 - K)$  also satisfy the optimality conditions and  $f_0 \in L_1(P)$  and  $g_0 \in L_1(Q)$ , we can assume without loss of generality that  $E_P f_0(X) = E_Q g_0(Y) = \frac{1}{2}S(P, Q) \geq 0$ . We define

$$\begin{aligned} f(x) &= -\log \int e^{g_0(y) - \frac{1}{2}\|x-y\|^2} dQ(y) \\ g(y) &= -\log \int e^{f(x) - \frac{1}{2}\|x-y\|^2} dP(x), \end{aligned}$$

for all  $x, y \in \mathbb{R}^d$ .

We need to check that these integrals are well defined. First, Jensen's inequality implies

$$\begin{aligned} g_0(y) &= -\log \int e^{f_0(x) - \frac{1}{2}\|x-y\|^2} dP(x) \\ &\leq -E_P f_0(X) + \frac{1}{2}E_P \|X - y\|^2 \\ &\leq \frac{1}{2}E_P \|X - y\|^2 \end{aligned}$$

for  $Q$ -a.e.  $y$ . Therefore

$$e^{g_0(y) - \frac{1}{2}\|x-y\|^2} \leq e^{\frac{1}{2}E_P \|X-y\|^2 - \frac{1}{2}\|x-y\|^2}$$

for  $Q$ -a.e.  $y$ . By Lemma A.1,  $E_P \|X\|^2 \leq 2d\sigma^2$ , which implies that  $e^{g_0(y) - \frac{1}{2}\|x-y\|^2}$  is dominated by  $e^{d\sigma^2 + (\|x\| + \sqrt{2}d\sigma)\|y\|}$ . Subgaussianity implies

$$\int e^{d\sigma^2 + (\|x\| + \sqrt{2}d\sigma)\|y\|} dQ(y) \leq 2e^{d\sigma^2(1 + \frac{1}{2}(\|x\| + \sqrt{2}d\sigma)^2)} < \infty$$

Therefore  $f(x)$  is well defined for all  $x \in \mathbb{R}^d$ . The same argument used to bound  $g_0$  holds for  $f$  as well, which implies that  $g$  is also well defined. Therefore our definitions of  $f$  and  $g$  are valid on the whole space, and moreover the claimed lower bounds on  $f$  and  $g$  hold. Jensen's inequality combined with the inequalities  $E_Q g_0(Y) \geq 0$  and  $E_P f(X) \geq 0$  yield the upper bounds. The smoothness of  $f$  and  $g$  follows from an easy application of dominated convergence.

We now show that  $(f, g)$  are optimal potentials. By construction  $\int e^{f(x) + g(y) - \frac{1}{2}\|x-y\|^2} dP(x) = 1$  for all  $y \in \mathbb{R}^d$ . Now, note that

$$\begin{aligned} \int e^{f(x) + g(y) - \frac{1}{2}\|x-y\|^2} dP(x) dQ(y) &= \int e^{f(x) + g_0(y) - \frac{1}{2}\|x-y\|^2} dP(x) dQ(y) \\ &= \int e^{f_0(x) + g_0(y) - \frac{1}{2}\|x-y\|^2} dP(x) dQ(y). \end{aligned}$$

Jensen's inequality yields

$$\begin{aligned} \int (f - f_0)(x) dP(x) + \int (g - g_0)(y) dQ(y) &\geq -\log \int e^{f_0(x) - f(x)} dP(x) - \log \int e^{g_0(y) - g(y)} dQ(y) \\ &= -\log \int e^{f_0(x) + g_0(y) - \frac{1}{2}\|x-y\|^2} dP(x) dQ(y) \\ &\quad - \log \int e^{f(x) + g_0(y) - \frac{1}{2}\|x-y\|^2} dP(x) dQ(y) \\ &= 0. \end{aligned}$$

Since  $(f_0, g_0)$  maximizes (3), so does  $(f, g)$ . Therefore  $(f, g)$  are optimal potentials. In particular, this implies that  $\int (g - g_0)(y) dQ(y) = \log \int e^{g_0(y) - g(y)} dQ(y)$ , and hence  $g = g_0$   $Q$ -almost surely by the strict concavity of the logarithm function. We obtain that  $\int e^{f(x) + g(y) - \frac{1}{2}\|x-y\|^2} dQ(y) = \int e^{f(x) + g_0(y) - \frac{1}{2}\|x-y\|^2} dQ(y) = 1$  for all  $x \in \mathbb{R}^d$ .  $\square$

**Proposition A.2.** *Let  $P_n, Q_n$  be empirical measures,  $P$  and  $Q$  both assumed subgaussian. There exist  $(f_n, g_n)$  optimal potentials for  $(P_n, Q_n)$  such that  $(f_n, g_n)$  converges uniformly in compacts to optimal potentials  $(f, g)$  for  $P$  and  $Q$ .*

*Proof.* The proof is inspired by Feydy et al. (2019) and we divide it in two steps:

**Step 1** By using the following extended version of the Arzela-Ascoli theorem we find a convergent subsequence: suppose  $h_n$  is a sequence of functions in  $\mathbb{R}^d$  satisfying

(a) Local equicontinuity: for each  $x_0 \in \mathbb{R}^d$  and  $\epsilon > 0$ , there is a  $\delta > 0$  such that

$$\|x - x_0\| < \delta \quad \text{implies} \quad |h_n(x) - h_n(x_0)| < \epsilon \quad \text{for all } n$$

(b) Pointwise boundedness: for each  $x$ , the sequence  $h_n(x)$  is bounded.

Then, there exist a subsequence  $h_{n_j}$  that converges uniformly on compacts to a continuous function  $h$ .

Step 2 We prove the limit functions are optimal for  $(P, Q)$  and conclude the entire sequence converges by a uniqueness argument.

*Proof of Step 1:* By Lemma A.2, there exists a (random)  $\sigma^2$  such that the measures  $\{P_n\}$  are uniformly  $\sigma^2$ -subgaussian. We choose  $(f_n, g_n)$  and  $(f, g)$  as in Proposition A.1.

By Proposition A.1,  $(f_n, g_n)$  are pointwise bounded by a quantity independent of  $n$ . Likewise, Proposition 1 implies that the derivatives of  $f_n$  and  $g_n$  are also pointwise bounded, which implies local equicontinuity.

We conclude for a certain subsequence  $n_j$ ,  $(f_{n_j}, g_{n_j})$  converges to some  $(f_\infty, g_\infty)$ .

*Proof of Step 2:* It is easy to verify (by Jensen's inequality and dominated convergence) that Proposition 11 in Feydy et al. (2019), holds in arbitrary domains (not necessarily bounded), and we can assume  $(f, g)$  are unique  $(P \otimes Q)$ -a.s. once we fix  $E_P f(X) = E_Q g(Y)$ . Notice that if  $f_\infty = f, g_\infty = g$ ,  $P$ -a.s. and  $Q$ -a.s. we can conclude: on each compact we apply the above argument starting with any arbitrary subsequence  $n_k$  and find a subsequence such that  $f_{n_{k_j}} \rightarrow f, g_{n_{k_j}} \rightarrow g$ ; therefore  $f = \lim f_n(x)$  and  $g(y) = \lim g_n$ , uniformly in compacts.

It therefore suffices to show that that i)  $(f_\infty, g_\infty)$  satisfy the dual optimality conditions and that  $f_\infty$  (respectively  $g_\infty$ ) is  $P$  (respectively  $Q$ ) integrable, with  $E_P f_\infty(X) = E_Q g_\infty(Y)$ . Let's prove i. Passing to a subsequence, we assume  $f_n \rightarrow f$  and  $g_n \rightarrow g$  uniformly on compact sets. We have

$$\begin{aligned} e^{-f_\infty(x)} &= \lim_{n \rightarrow \infty} \int e^{g_n(y) - \frac{1}{2}\|x-y\|^2} dQ_n(y) \\ e^{-g_\infty(y)} &= \lim_{n \rightarrow \infty} \int e^{f_n(x) - \frac{1}{2}\|x-y\|^2} dP_n(x). \end{aligned}$$

It suffices to show that the order of the limit and integral on the right side can be swapped. For a fixed  $x$  we observe that Proposition A.1 implies that the integrand is dominated by a uniformly integrable function. Therefore for an arbitrary  $\varepsilon > 0$  there exists a compact set  $K$  such that

$$\begin{aligned} \int_{K^c} e^{g_\infty(y) - \frac{1}{2}\|x-y\|^2} dQ(y) &\leq \varepsilon \\ \int_{K^c} e^{g_n(y) - \frac{1}{2}\|x-y\|^2} dQ_n(y) &\leq \varepsilon \quad \forall n \geq 0. \end{aligned}$$

Write  $v_n(y) = e^{g_n(y) - \frac{1}{2}\|x-y\|^2}$  and  $v_\infty = e^{g_\infty(y) - \frac{1}{2}\|x-y\|^2}$ . Since  $g_n$  converges uniformly in compacts so does  $v_n$ ; in particular, there exists  $n_0$  such that if  $n \geq n_0$ ,

$$|v_n(y) - v_\infty(y)| \leq \varepsilon, \forall y \in K. \quad (1)$$

Also, since  $v_\infty$  is  $Q$ -integrable, by the strong law of large numbers, almost surely there exists an  $n_1$  such that if  $n \geq n_1$ ,

$$\left| \int v_\infty(y) dQ_n(y) - \int v_\infty(y) dQ(y) \right| \leq \varepsilon, \quad (2)$$

We obtain that for  $n$  sufficiently large,

$$\left| \int v_n(y) dQ_n(y) - \int v_\infty(y) dQ(y) \right| \leq 4\varepsilon.$$

Since  $\varepsilon$  was arbitrary, we obtain

$$e^{-f_\infty(x)} = \int v_\infty(y) dQ(y) = \int e^{g_\infty(y) - \frac{1}{2}\|x-y\|^2} dQ(y).$$

Repeating the proof for  $g_\infty$ , we obtain that  $(f_\infty, g_\infty)$  satisfy the dual optimality conditions.

Clearly  $(f_\infty, g_\infty)$  are integrable by dominated convergence, and an argument analogous to the one used to show dual optimality establishes that  $E_P f_\infty(X) = E_Q g_\infty(Y)$ . The claim is therefore proved.  $\square$

**Lemma A.2.** Suppose  $P$  is a  $\sigma^2$ -subgaussian measure. Then, there exists a (random)  $\sigma_u < \infty$  such that  $\{P_n\}, P$  are uniformly  $\sigma_u^2$ -subgaussian  $P$  almost surely.

*Proof.* By definition, there exists  $\sigma > 0$  such that  $E_P \left( e^{\frac{\|X\|^2}{2\sigma^2 d}} \right) \leq 2$ . By the strong law of large numbers we have that  $P$  almost surely

$$\lim_{n \rightarrow \infty} E_{P_n} \left( e^{\frac{\|X\|^2}{2\sigma^2 d}} \right) = E_P \left( e^{\frac{\|X\|^2}{2\sigma^2 d}} \right) \leq 2.$$

In particular, this implies the sequence  $E_{P_n} \left( e^{\frac{\|X\|^2}{2\sigma^2 d}} \right)$  is bounded by a random positive number. By the equivalence of definitions of subgaussianity, this implies that  $P_n$  are uniformly subgaussian, with a new parameter that we call  $\sigma_u^2$ .  $\square$

**Proposition A.3.** Assume  $P$  and  $Q$  are subgaussian. Let  $(f, g)$  be the corresponding optimal dual potentials constructed in Proposition A.1, and define

$$R_n = S(P_n, Q) - \int f(x) dP_n(x).$$

Then,

$$\lim_{n \rightarrow \infty} n \text{Var}(R_n) = 0.$$

Our proof relies on the tensorization property for the variance (Efron and Stein, 1981; Boucheron et al., 2013; van Handel, 2014), also known as Efron-Stein inequality: Let  $X_1, \dots, X_n$  be i.i.d r.v's with distribution  $P$  and  $X'_1, \dots, X'_n$  be independent copies of  $X_1, \dots, X_n$ . Also, let  $w$  be an arbitrary measurable function of the sample that is symmetric on its coordinates, and define  $Z = w(X_1, \dots, X_n)$  and  $Z' = w(X'_1, X_2, \dots, X_n)$ . Then,

$$\text{Var}(Z) \leq \frac{n}{2} E(Z - Z')_+^2. \quad (3)$$

*Proof of Proposition A.3.* Denote by  $P'_n$  the empirical distribution of  $X'_1, X_2, \dots, X_n$ , and let

$$R'_n = S(P'_n, Q) - \int f(x) dP'_n(x).$$

by Efron-Stein, it suffices to show  $\lim_{n \rightarrow \infty} n^2 E(R_n - R'_n)_+^2 = 0$ . We divide the proof in the verification of two statements. First, we show  $\lim_{n \rightarrow \infty} n(R_n - R'_n)_+ = 0$ . We will then show that  $n^2(R_n - R'_n)_+^2$  is uniformly integrable.

Call  $(f_n, g_n)$  the optimal potentials associated to  $(P_n, Q)$ . Since  $P_n$  is subgaussian by Lemma A.2, Proposition A.1 implies that we can assume that  $(f_n, g_n)$  satisfy the dual optimality conditions for all  $x, y \in \mathbb{R}^d$ . Therefore

$$\begin{aligned} S(P_n, Q) &= \int f_n(x) dP_n(x) + \int g_n(y) dQ(y), \\ S(P'_n, Q) &\geq \int f_n(x) dP'_n(x) + \int g_n(y) dQ(y) - \iint e^{f_n(x) + g_n(y) - \frac{1}{2}\|x-y\|^2} dP'_n(x) dQ(y) + 1 \\ &= \int f_n(x) dP'_n(x) + \int g_n(y) dQ(y). \end{aligned}$$

Therefore,

$$n(R_n - R'_n)_+ \leq (f_n(X_1) - f(X_1)) - (f_n(X'_1) - f(X'_1)).$$

By Proposition A.2,  $(f_n, g_n)$  converges pointwise to  $(f, g)$  almost surely, so  $\lim_{n \rightarrow \infty} n(R_n - R'_n)_+ = 0$  almost surely.

To show uniform integrability, we note that  $n(R_n - R'_n) = n(S(P_n, Q) - S(P'_n, Q)) - (f(X_1) - f(X'_1))$  and by Proposition A.1 and the subgaussianity of  $P, f(X_1), f(X'_1)$  have finite second moments. It therefore suffices to show that  $n^2(S(P_n, Q) - S(P'_n, Q))_+^2$  is uniformly integrable.

Let  $\pi'$  be the underlying optimal entropic coupling between  $P'_n$  and  $Q$  that we disintegrate in terms of  $Q$  and the (random) kernel  $\{P'(\cdot|y)\}_y$  of conditional distributions over the sample  $P'_n$  given  $y$ , i.e.

$$d\pi'(x, y) = dQ(y) \left( P'(x|y)\delta_{X'_1}(x) + \sum_{i=2}^n P'(x|y)\delta_{X_i}(x) \right).$$

We now slightly modify  $\pi'$  to make it have  $P_n$  as first marginal; specifically, we define

$$d\bar{\pi}(x, y) = dQ(y) \left( \sum_{i=1}^n \bar{P}(x|y)\delta_{X_i}(x) \right), \text{ with } \bar{P}(x|y) = \begin{cases} P'(X'_1|y) & x = X_1 \\ P'(X_i|y) & x = X_i, i \neq 1 \end{cases}.$$

By the definitions of  $S(P_n, Q)$  and  $S(P'_n, Q)$ , it is easily verified that

$$S(P_n, Q) \leq \sum_{i=1}^n \int \frac{\|X_i - y\|^2}{2} \bar{P}(X_i|y) dQ(y) + I(\bar{\pi}),$$

and that

$$S(P'_n, Q) = \int \frac{\|X'_1 - y\|^2}{2} P'(X'_1|y) dQ(y) + \sum_{i=2}^n \int \frac{\|X_i - y\|^2}{2} P'(X_i|y) dQ(y) + I(\pi'),$$

where  $I(\cdot)$  denotes mutual information. Therefore,

$$S(P_n, Q) - S(P'_n, Q) \leq I(\bar{\pi}) - I(\pi') + \int \frac{\|X_1 - y\|^2 - \|X'_1 - y\|^2}{2} P'(X'_1|y) dQ(y). \quad (4)$$

Observe that  $I(\bar{\pi}) = I(\pi')$  since  $I(\pi')$  doesn't depend on the sample values, but only in the way the conditionals  $P'(\cdot|y)$  split over the sample, which by construction is the same for both  $\bar{\pi}$  and  $\pi'$ . Therefore, we only need to bound the (expected squared) integral in (4), and we proceed as in Del Barrio and Loubes (2019). Specifically, we have

$$\begin{aligned} S(P_n, Q) - S(P'_n, Q) &\leq \int \frac{\|X_1 - y\|^2 - \|X'_1 - y\|^2}{2} P'(X'_1|y) dQ(y) \\ &\leq \frac{1}{2} \|X_1 - X'_1\| \left( \frac{\|X_1\| + \|X'_1\|}{n} + 2 \int \|y\| P'(X'_1|y) dQ(y) \right), \end{aligned} \quad (5)$$

from which it follows that

$$n^2(S(P_n, Q) - S(P'_n, Q))^2_+ \leq (\|X_1 - X'_1\|^2 \|X_1\|^2) + n^2 \|X_1 - X'_1\|^2 \left( \int \|y\| P'(X'_1|y) dQ(y) \right)^2. \quad (6)$$

The first term is clearly uniformly integrable since  $P$  has moments of all orders, so we focus on the second term.

By Cauchy-Schwartz,

$$\begin{aligned} E \left( \|X_1 - X'_1\|^4 \left( \int \|y\| P'(X'_1|y) dQ(y) \right)^4 \right)^2 &\leq E \left( \|X_1 - X'_1\|^8 \right) \times \\ &\quad E \left( \left( \int \|y\| P'(X'_1|y) dQ(y) \right)^8 \right). \end{aligned}$$

And now, by Hölder's inequality,

$$\begin{aligned} \left( \int \|y\| P'(X'_1|y) dQ(y) \right)^8 &\leq \left( \int P'(X'_1|y) dQ(y) \right)^7 \left( \int \|y\|^8 P'(X'_1|y) dQ(y) \right) \\ &= \frac{1}{n^7} \left( \int \|y\|^8 P'(X'_1|y) dQ(y) \right). \end{aligned}$$

Also, notice that the r.v.'s  $\int \|y\|^8 P'(X'_i|y)dQ(y)$  are equally distributed, and therefore

$$E \left( \int \|y\|^8 P'(X'_1|y)dQ(y) \right) = \frac{1}{n} E \left( \sum_{i=1}^n \int \|y\|^8 P'(X'_i|y)dQ(y) \right) = \frac{1}{n} E \left( \int \|y\|^8 dQ(y) \right).$$

We obtain

$$E \left( \left( \int \|y\| P'(X'_1|y)dQ(y) \right)^8 \right) \leq \frac{1}{n^8} \int \|y\|^8 dQ(y). \quad (7)$$

Together, (7) and (7) imply that the quantity  $n^2 \|X_1 - X'_1\|^2 \left( \int \|y\| P'(X'_1|y)dQ(y) \right)^2$  has uniformly bounded second moments, and is therefore uniformly integrable. Therefore  $n^2 (S(P_n, Q) - S(P'_n, Q))^2_+$  is uniformly integrable as well, and combining this with the almost sure convergence implies the claim.  $\square$

**Lemma A.3.** *Let  $\mu_\beta$  be defined as in (8). Then*

$$|\mu_\beta| \leq C_{|\beta|,d} \begin{cases} \sigma^{|\beta|}(\sigma + \sigma^2)^{|\beta|} & \|x\| \leq \sqrt{d}\sigma \\ \sigma^{|\beta|}(\sqrt{\sigma}\|x\| + \sigma\|x\|)^{|\beta|} & \|x\| > \sqrt{d}\sigma. \end{cases}$$

*Proof.* To bound  $\mu_\beta$ , we split the integral in the numerator according to the norm of  $y$ . Let  $A = \{y : \|y\| \leq \tau\}$ , where  $\tau$  is a threshold to be chosen. Then

$$\mu_\beta = \frac{\int \mathbf{1}_A y^\beta e^{g(y) - \frac{1}{2}\|y\|^2 + x \cdot y} dQ(y)}{\int e^{g(y) - \frac{1}{2}\|y\|^2 + x \cdot y} dQ(y)} + \frac{\int \mathbf{1}_{\bar{A}} y^\beta e^{g(y) - \frac{1}{2}\|y\|^2 + x \cdot y} dQ(y)}{\int e^{g(y) - \frac{1}{2}\|y\|^2 + x \cdot y} dQ(y)}.$$

The first term is clearly bounded by  $\tau^\beta$ . For the second, we apply Proposition A.1 to show

$$\left( \int e^{g(y) - \frac{1}{2}\|y\|^2 + x \cdot y} dQ(y) \right)^{-1} = e^{-\frac{1}{2}\|x\|^2} e^{f(x)} \leq e^{d\sigma^2 + \sqrt{d}\sigma\|x\|}$$

and

$$e^{g(y) - \frac{1}{2}\|y\|^2} \leq e^{d\sigma^2 + \sqrt{d}\sigma\|y\|}.$$

We obtain

$$\begin{aligned} \frac{\int \mathbf{1}_{\bar{A}} y^\beta e^{g(y) - \frac{1}{2}\|y\|^2 + x \cdot y} dQ(y)}{\int e^{g(y) - \frac{1}{2}\|y\|^2 + x \cdot y} dQ(y)} &\leq e^{2d\sigma^2 + \sqrt{d}\sigma\|x\|} \int \mathbf{1}_{\bar{A}} y^\beta e^{\sqrt{d}\sigma\|y\| + x \cdot y} dQ(y) \\ &\leq e^{2d\sigma^2 + \sqrt{d}\sigma\|x\|} \left( \int \mathbf{1}_{\bar{A}} y^{2\beta} dQ(y) \right)^{1/2} \left( \int e^{2(\sqrt{d}\sigma + \|x\|)\|y\|} dQ(y) \right)^{1/2} \end{aligned}$$

Since  $Q$  is subgaussian, Lemma A.1 and the definition of  $A$  imply

$$\left( \int \mathbf{1}_{\bar{A}} y^{2\beta} dQ(y) \right)^{1/2} \leq e^{-\frac{\tau^2}{8d\sigma^2}} \left( \int e^{\frac{\|y\|^2}{4d\sigma^2}} y^{2\beta} dQ(y) \right)^{1/2} \leq \sqrt{2} e^{-\frac{\tau^2}{8d\sigma^2}} (2|\beta|)!^{1/4} (\sqrt{2d}\sigma)^{|\beta|}.$$

Lemma A.1 also implies

$$\int e^{2(\sqrt{d}\sigma + \|x\|)\|y\|} dQ(y) \leq 2e^{2d\sigma^2(\|x\| + \sqrt{d}\sigma)^2}.$$

Therefore, if we choose  $\tau^2 \geq C_{|\beta|,d}(\sigma^4 + \sigma^6)$  if  $\|x\| \leq \sqrt{d}\sigma$  and  $\tau^2 \geq C_{|\beta|,d}(\sigma^3\|x\| + \sigma^4\|x\|^2)$  if  $\|x\| > \sqrt{d}\sigma$  for a sufficiently large constant  $C_{|\beta|,d}$ , then we will have

$$\frac{\int \mathbf{1}_{\bar{A}} y^\beta e^{g(y) - \frac{1}{2}\|y\|^2 + x \cdot y} dQ(y)}{\int e^{g(y) - \frac{1}{2}\|y\|^2 + x \cdot y} dQ(y)} \leq C_{|\beta|,d} (\sqrt{d}\sigma)^{|\beta|}$$

Combining this with the bound on the first term yields the claim.  $\square$

**Lemma A.4.** *Let  $\tilde{\sigma}$  be defined as in the proof of Theorem 2. Then for any positive integer  $k$ ,*

$$E \tilde{\sigma}^{2k} \leq 2k^k \sigma^{2k}.$$

*Proof.* First, let  $P$  be an arbitrary probability distribution, and let  $\alpha > 0$ . We first show that if  $t = E_P e^{\frac{\|X\|^2}{\alpha}}$  is finite, then  $P$  is  $t\frac{\alpha}{2d}$ -subgaussian. To see this, set  $\tau^2 = t\frac{\alpha}{2d}$ . Then

$$E e^{\frac{\|X\|^2}{2d\tau^2}} \leq \left( E e^{\frac{\|X\|^2}{\alpha}} \right)^{\frac{\alpha}{2d\tau^2}} = t^{1/t} \leq e^{1/e} < 2,$$

where the first step uses Jensen's inequality and the fact that  $t \geq 1$ .

The above considerations imply that if  $Q$  is  $\sigma^2$  subgaussian and we set

$$\tau^2 = \max\{E_{P_n} e^{\frac{\|X\|^2}{2kd\sigma^2}} k\sigma^2, E_{Q_n} e^{\frac{\|Y\|^2}{2kd\sigma^2}} k\sigma^2\},$$

then  $P_n, Q_n, P$ , and  $Q$  are all  $\tau^2$  subgaussian, which implies that  $\tilde{\sigma}^2 \leq \tau^2$ . Therefore, by Jensen's inequality,

$$\tilde{\sigma}^{2k} \leq E_{P_n} e^{\frac{\|X\|^2}{2d\sigma^2}} k^k \sigma^{2k} + E_{Q_n} e^{\frac{\|Y\|^2}{2d\sigma^2}} k^k \sigma^{2k},$$

and taking expectations with respect to  $P$  and  $Q$  yields

$$E\tilde{\sigma}^{2k} \leq E_P e^{\frac{\|X\|^2}{2d\sigma^2}} k^k \sigma^{2k} + E_Q e^{\frac{\|Y\|^2}{2d\sigma^2}} k^k \sigma^{2k} \leq 4k^k \sigma^{2k}.$$

□

## B Omitted proofs

### B.1 Proof of Proposition 1

We choose the potentials  $f$  and  $g$  as in Proposition A.1. That establishes the  $k = 0$  case.

For convenience, write  $\bar{f}(x) = f(x) - \frac{1}{2}\|x\|^2$ . We seek to bound  $|D^\alpha \bar{f}(x)|$ .

Our calculation is similar to classical calculations which relate the cumulants of a distribution to its moments (see McCullagh, 1987, Section 2.3). Given a multi-index  $\beta$ , write

$$\mu_\beta = \frac{\int y^\beta e^{g(y) - \frac{1}{2}\|y\|^2 + x \cdot y} dQ(y)}{\int e^{g(y) - \frac{1}{2}\|y\|^2 + x \cdot y} dQ(y)}. \quad (8)$$

We use the convention that  $y^\beta = \prod_{i=1}^d y_i^{\beta_i}$ . The notation  $\mu_\beta$  is chosen to remind the reader that these quantities are moments of  $y$  under the tilted measure whose density with respect to  $Q$  is proportional to  $e^{g(y) - \frac{1}{2}\|y\|^2 + x \cdot y}$ .

By the multivariate Faà di Bruno formula (see, e.g. Constantine and Savits, 1996),

$$D^\alpha \bar{f}(x) = -D^\alpha \log(e^{-\bar{f}(x)}) = \sum_{\substack{\beta_1, \dots, \beta_k \\ \beta_1 + \dots + \beta_k = \alpha}} \lambda_{\alpha, \beta_1, \dots, \beta_k} \prod_{j=1}^k \mu_{\beta_j}, \quad (9)$$

where the coefficients  $\lambda_{\alpha, \beta_1, \dots, \beta_k}$  are combinatorial quantities related to partitions of  $[k]$  whose precise value is unimportant.

Applying Lemma A.3 yields the claim.

### B.2 Proof of Proposition 3

We use the symbol  $C$ , decorated with subscripts, to indicate constants whose value may change from line to line. We apply van der Vaart and Wellner (1996, Corollary 2.7.4). Denote by  $L$  the quantity  $\frac{1}{n} \sum_{i=1}^n e^{\|x_i\|^2 / 2d\sigma^2}$ . The subgaussianity of  $P$  implies that  $EL \leq 2$ . We partition  $\mathbb{R}^d$  into sets  $B_j$  defined by  $B_0 = [-\sigma, \sigma]^d$  and  $B_j = [-2^j\sigma, 2^j\sigma] \setminus [-2^{j-1}\sigma, 2^{j-1}\sigma]$ . Note that for each  $j$ , the Lebesgue measure of  $\{x : d(x, B_j) \leq 1\}$  is bounded by  $C_d(1 + \sigma^d 2^{dj})$ . Moreover, by Markov's inequality, the mass that  $P_n$  assigns to each  $B_j$  is at most  $Le^{-2^{2j-3}}$ . Finally, by definition of the class  $\mathcal{F}^s$ , the functions in  $\mathcal{F}^s$  have  $\mathcal{C}^s(B_0)$  norm at most  $C_{s,d}(1 + \sigma^s)$ , and on  $B_j$  for  $j \geq 1$  have  $\mathcal{C}^s(B_j)$  norm at most  $C_{s,d}2^{js}(1 + \sigma^s)$ , where  $\mathcal{C}^s(\Omega)$  represents the Hölder space on  $\Omega$  of smoothness  $s$ .

Applying van der Vaart and Wellner (1996, Corollary 2.7.4) with  $V = d/s$  and  $r = 2$  yields

$$\begin{aligned} \log N(\varepsilon, \mathcal{F}^s, L_2(P_n)) &\leq C_d \varepsilon^{-d/s} L^{d/2s} \left( \sum_{j \geq 0} (1 + \sigma^d 2^{dj})^{\frac{2s}{d+2s}} 2^{\frac{2dj s}{d+2s}} (1 + \sigma^s)^{\frac{2d}{d+2s}} e^{-\frac{d 2^{2j-3}}{d+2s}} \right)^{\frac{d+2s}{2s}} \\ &\leq C_d \varepsilon^{-d/s} L^{d/2s} (1 + \sigma^{2d}) \left( \sum_{j \geq 0} 2^{\frac{4dj s}{d+2s}} e^{-\frac{d 2^{2j-3}}{d+2s}} \right)^{\frac{d+2s}{2s}} \\ &\leq C_d \varepsilon^{-d/s} L^{d/2s} (1 + \sigma^{2d}), \end{aligned}$$

where the final step follows because the series is summable with value independent of  $\sigma$  and  $L$ .

To show the second claim, we note that  $E_{P_n} \|X\|^4 \leq C_d L \sigma^4$  by the same argument used to bound the moments of  $P$  in Lemma A.1. The definition of the class  $\mathcal{F}^s$  implies

$$\max_{f \in \mathcal{F}^s} \|f\|_{L_2(P_n)}^2 = \max_{f \in \mathcal{F}^s} E_{P_n} |f(X)|^2 \leq C_d E_{P_n} (1 + \|X\|^4) \leq C_d (1 + L \sigma^4).$$

□

## References

- Boucheron, S., Lugosi, G., and Massart, P. (2013). *Concentration inequalities: A nonasymptotic theory of independence*. Oxford university press.
- Constantine, G. M. and Savits, T. H. (1996). A multivariate Faà di Bruno formula with applications. *Trans. Amer. Math. Soc.*, 348(2):503–520.
- Del Barrio, E. and Loubes, J.-M. (2019). Central limit theorems for empirical transportation cost in general dimension. *The Annals of Probability*, 47(2):926–951.
- Efron, B. and Stein, C. (1981). The jackknife estimate of variance. *The Annals of Statistics*, pages 586–596.
- Feydy, J., Séjourné, T., Vialard, F.-X., Amari, S.-I., Trounevé, A., and Peyré, G. (2019). Interpolating between optimal transport and MMD using Sinkhorn divergences. In *Proceedings of the 22nd International Conference on Artificial Intelligence and Statistics (AISTATS)*.
- McCullagh, P. (1987). *Tensor methods in statistics*. Monographs on Statistics and Applied Probability. Chapman & Hall, London.
- van der Vaart, A. W. and Wellner, J. A. (1996). *Weak convergence and empirical processes*. Springer Series in Statistics. Springer-Verlag, New York. With applications to statistics.
- van Handel, R. (2014). Probability in high dimension. Technical report, Princeton University.
